# Supplementary material
Source: PubMed Central journal article supplement (PMC3131924)

## Supplementary information

### **Parkin is transcriptionally regulated by ATF4:**

#### **evidence for an interconnection between mitochondrial stress and ER stress**

Lena Bouman<sup>1</sup>, Anita Schlierf<sup>1</sup>, A. Kathrin Lutz<sup>1</sup>, Jixiu Shan<sup>2</sup>, Alexandra Deinlein<sup>1</sup>, Jessica Kast<sup>1</sup>, Zohreh Galehdar<sup>3</sup>, Vincenza Palmisano<sup>1</sup>, Nadja Patenge<sup>5</sup>, Daniela Berg<sup>5</sup>, Thomas Gasser<sup>5</sup>, Regina Augustin<sup>6</sup>, Dietrich Trümbach<sup>6</sup>, Isabella Irrcher<sup>3</sup>, David S. Park<sup>3,4</sup>, Wolfgang Wurst<sup>6,7</sup>, Michael S. Kilberg<sup>2</sup>, Jörg Tatzelt<sup>1</sup> and Konstanze F. Winklhofer<sup>1\*</sup>

<sup>1</sup>Adolf Butenandt Institute, Neurobiochemistry, Ludwig Maximilians University, and German Center for Neurodegenerative Diseases, Schillerstr. 44, 80336 Munich, Germany;

<sup>2</sup>Department of Biochemistry and Molecular Biology, Genetics Institute, Shands Cancer Center and Center for Nutritional Sciences, University of Florida College of Medicine, Gainesville, FL 32610, USA; <sup>3</sup>Cellular and Molecular Medicine, University of Ottawa, Ottawa, Canada; <sup>4</sup>Department of Cogno-Mechatronics Engineering, Pusan National University, South Korea; <sup>5</sup>Department of Neurodegeneration, Hertie Institute for Clinical Brain Research, University of Tübingen, and German Center for Neurodegenerative Diseases Hoppe-Seyler-Str. 3, 72076 Tübingen, Germany; <sup>6</sup>Helmholtz Centre Munich, German Research Centre for Environmental Health, Technical University Munich, Institute of Developmental Genetics, and German Center for Neurodegenerative Diseases, Ingolstaedter Landstr. 1, 85764 Munich/Neuherberg, Germany. <sup>7</sup>Max Planck Institute of Psychiatry, Kraepelinstr. 2, 80804 Munich, Germany.

\*To whom correspondence should be addressed:

Konstanze F. Winklhofer, Schillerstr. 44, D-80336 Munich, telephone: +49 89 2180 75483,  
fax: +49 89 2180 75415, E-mail: [Konstanze.Winklhofer@med.uni-muenchen.de](mailto:Konstanze.Winklhofer@med.uni-muenchen.de)

Running title: Parkin, ER stress and mitochondria

Key words: ATF4/ c-Jun/ER stress/JNK/parkin/Parkinson's disease/UPR

### **Supplemental Figure 1:**

#### **Mitochondrial stress induced by CCCP activates ATF4-dependent transcription.**

HEK293T cells were transfected with the ATF4RE-luc reporter construct containing a confirmed ATF4-binding site (A), or with park-luc (B), containing the putative ATF4-binding site of the parkin promoter. One day after transfection the cells were exposed to CCCP (10  $\mu$ M for 24 h). Shown is the fold induction of luciferase activity in CCCP-treated cells in comparison to non-treated control cells.

### **Supplemental Figure 2:**

**c-Jun knockdown efficiency corresponding to the experiment shown in Fig. 5 D.** mRNA levels were determined by quantitative RT-PCR using c-Jun-specific primers.

### **Supplemental Figure 3:**

**Parkin-deficiency decreases cell viability in response to ER stress.** HEK293T cells (A) or SH-SY5Y cells (B) were transfected with parkin-specific or control siRNA duplexes. Three days later the cells were stressed with TG (10  $\mu$ M) or TM (2  $\mu$ g/ml) for 16 h. Cellular viability was determined by the MTT assay. Shown is the relative viability of cells transfected with parkin siRNA in comparison to control siRNA-transfected cells treated with ER stressors based on triplicates of at least 3 independent experiments. The parkin knockdown efficiency was verified by Western blotting using the anti-parkin mAb PRK8 (A, lower panel) or by quantitative RT-PCR using parkin-specific primers (B, lower panel).

### **Supplemental Figure 4:**

**CHOP, phospho-c-Jun and phospho-JNK are sensitive to the severity of ER stress and are increased in parkin-deficient cells.** A, B. Levels of CHOP, phospho-c-Jun and phospho-JNK increase with the severity of ER stress in SH-SY5Y cells. SH-SY5Y cells were treated

with thapsigargin (TG) at the indicated concentrations for 16 h to analyze CHOP levels (A) or 1 h to determine the levels of phospho-c-Jun and phospho-JNK (B) by Western blotting. Loading was controlled by re-probing the blots for  $\beta$ -actin. **C, D.** CHOP, phospho-c-Jun and phospho-JNK levels are increased in parkin-deficient patient fibroblasts. Skin fibroblasts from a patient with pathogenic mutations in the parkin gene leading to a loss of parkin expression, were incubated with TG at the indicated concentrations for 16 h to analyze CHOP levels (C) or 1 h to determine the levels of phospho-c-Jun and phospho-JNK (D) by Western blotting. As a control, age- and gender-matched skin fibroblasts were analyzed in parallel. Loading was controlled by re-probing the blots for  $\beta$ -actin. The two JNK-immunoreactive bands represent phosphorylated JNK1 (46 kDa) and JNK2/3 (54 kDa), respectively.

#### **Supplemental Figure 5:**

##### **ER stress luciferase reporter constructs cloned to quantify the ER stress response.**

Binding of ER stress-specific transcription factors to specific sites and UPR transducers involved are schematically shown. ERSE: ER stress response element, UPRE: unfolded protein response element, ERSE II: ER stress response element II, ATF4RE: ATF4 response element.

#### **Supplemental Figure 6:**

##### **CHOP suppresses the activation of the park-luc reporter construct in response to ER**

**stress.** HEK293T cells were co-transfected with the park-luc reporter plasmid and ATF4, CHOP (1), or GFP (as a control). 8 h after transfection cells were incubated with 1  $\mu$ M TG for 14 h. Shown is the fold induction of luciferase activity in comparison to GFP-expressing control cells based on triplicates of at least 3 independent experiments (left panel). Expression levels of ATF4 and CHOP were analyzed by immunoblotting using the anti-ATF4 pAb C-20

or the anti-CHOP sc-7351 mAb (Santa Cruz Biotechnology, Santa Cruz, CA, USA) (right panel). Loading was controlled by re-probing the blots for  $\beta$ -actin. \*\*\*  $p < 0.001$ .

**Reference:**

1. Al Sarraj J, Vinson C, Thiel G. Regulation of asparagine synthetase gene transcription by the basic region leucine zipper transcription factors ATF5 and CHOP. Biol Chem. 2005 Sep;386(9):873-879.

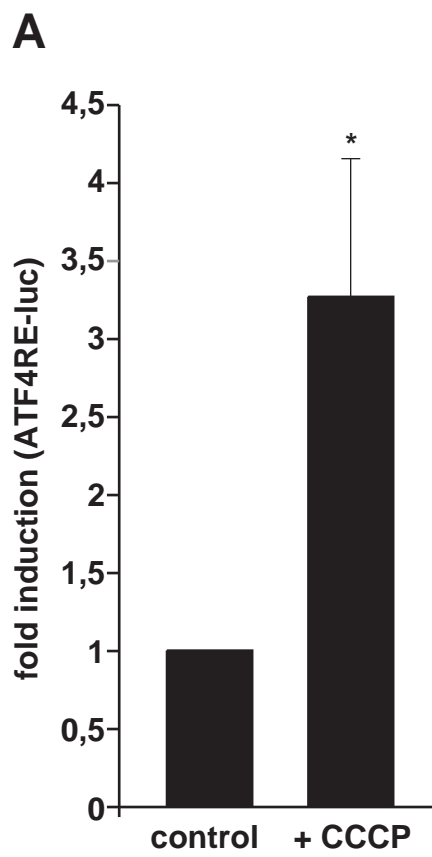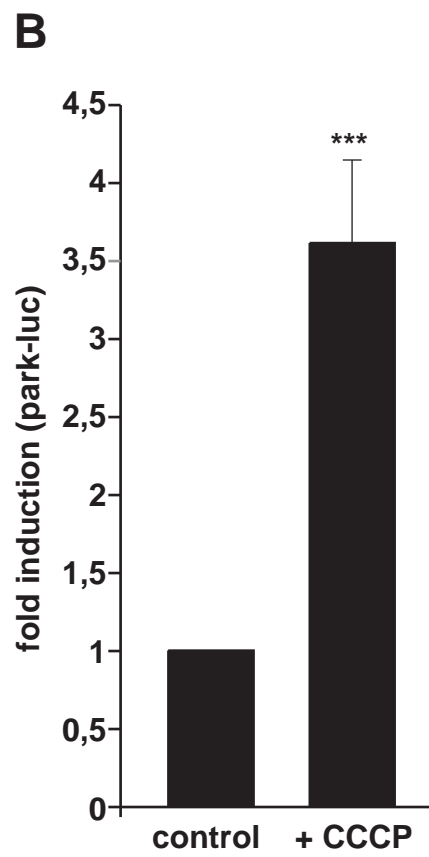

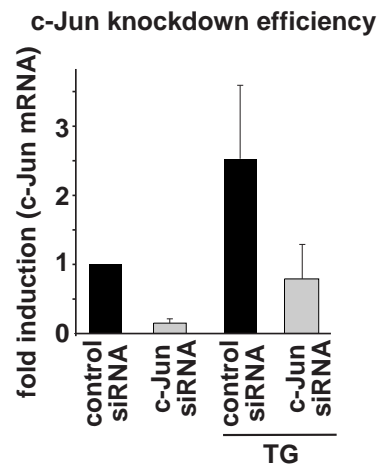

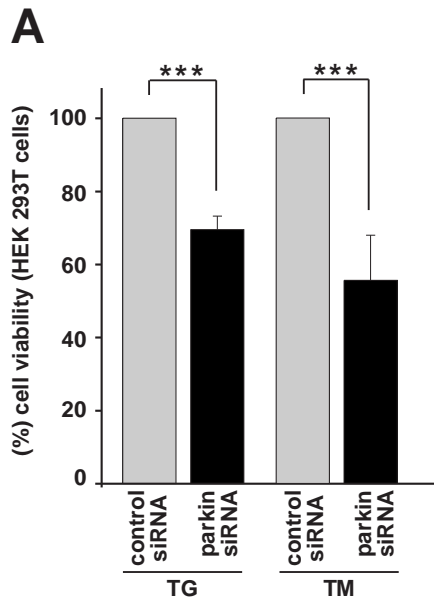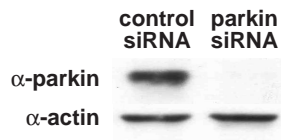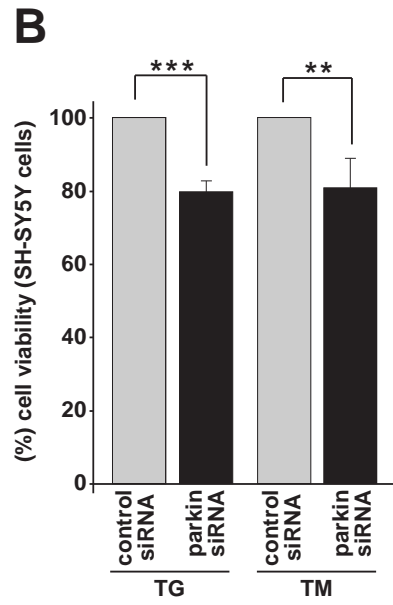

parkin knockdown efficiency in SH-SY5Y cells

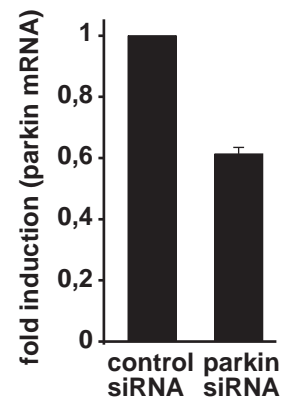



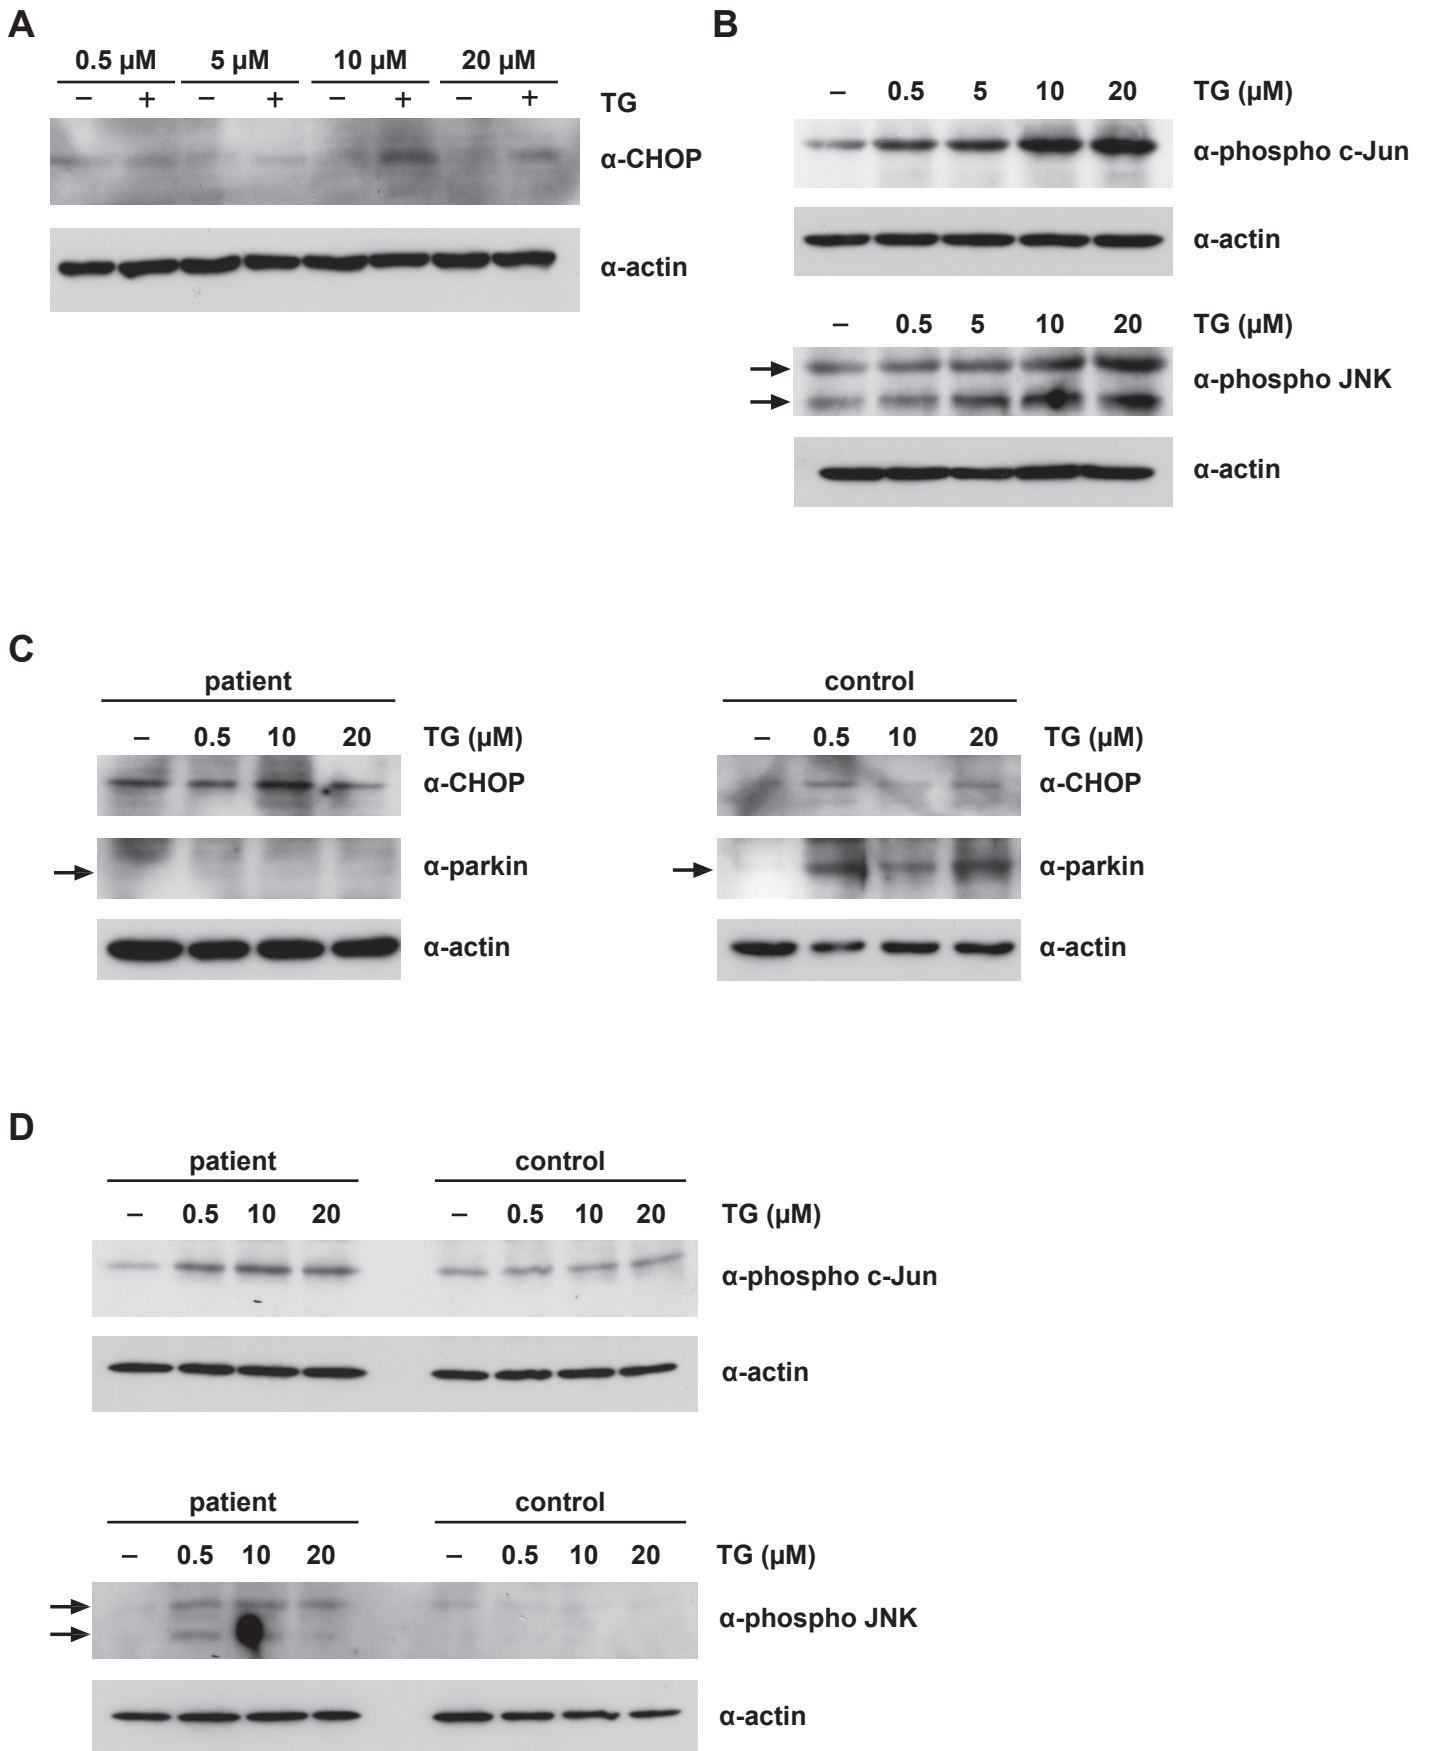

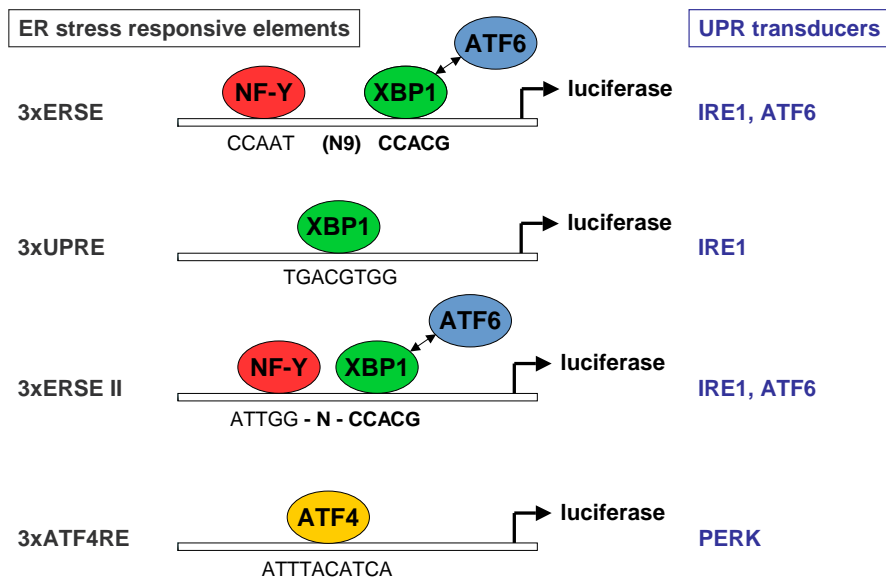

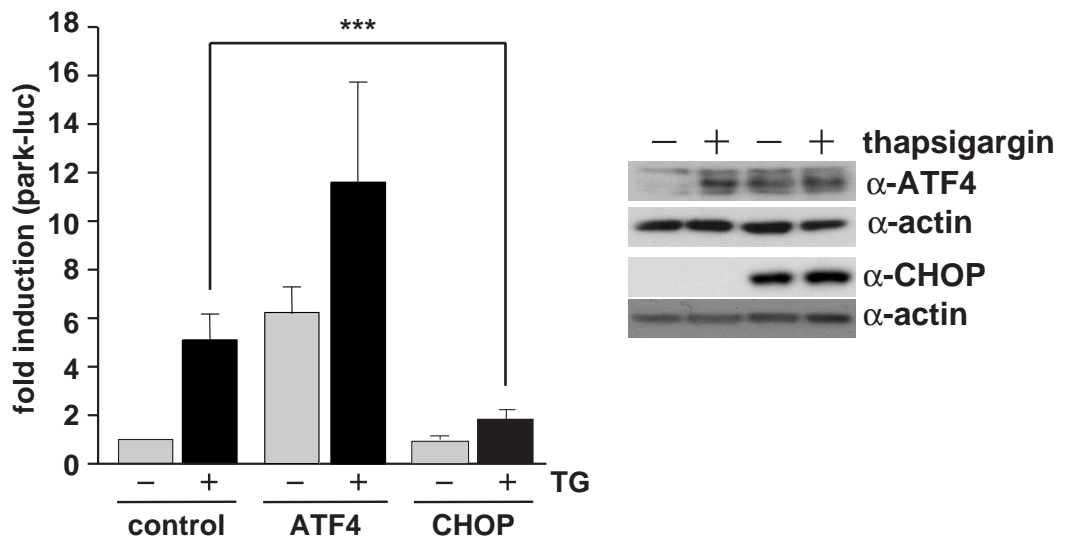

Supplement: cdd2010142x1.pdf [file cdd2010142x1.pdf]
